# Supplementary material for: Adsorption of Zn(ii) on amination@wood-aerogel and high-value reuse to ZnO/ZnS as an efficient photocatalyst
Source: Royal Society of Chemistry journal article supplement (doi:10.1039/d2ta05001c), 2022-01-01
Supplement: d2ta05001c1.pdf [file d2ta05001c1.pdf]

## Supporting Information

# **Adsorption of Zn(II) on Amination@Wood-Aerogel and high-value reuse to ZnO/ZnS as efficient photocatalyst**

Wanqi Zhang<sup>a, †</sup>, Lili Li<sup>a, †</sup>, Xiaotao Zhang<sup>b, c, †, \*</sup>, Hui Liu<sup>a</sup>, Yuhong An<sup>a</sup>, Yuan Zhong<sup>a</sup>, Zichu Hu<sup>b</sup>, Xiaofei Shan<sup>a</sup>, Jing Wu<sup>a</sup>, Marshall White<sup>d</sup>, Zhangjing Chen<sup>d</sup>, Ximing Wang<sup>a, c, \*</sup>

<sup>a</sup> College of Material Science and Art Design, Inner Mongolia Agricultural University, Hohhot 010018, China.

<sup>b</sup> College of Science, Inner Mongolia Agricultural University, Hohhot 010018, China.

<sup>c</sup> Inner Mongolia Key Laboratory of Sandy Shrubs Fibrosis and Energy Development and Utilization, Hohhot 010018, China.

<sup>d</sup> Department of Sustainable Biomaterials, Virginia Polytechnic Institute and State University, Blacksburg, VA, 24060, USA.

\*Corresponding author: Xiaotao Zhang, Email: [lianxixiaotao@163.com](mailto:lianxixiaotao@163.com); Ximing Wang, Email: [wangximing@imau.edu.cn](mailto:wangximing@imau.edu.cn)

<sup>†</sup> These authors contributed equally to this work.

## Text S1

**Characterization.** The morphology and structure of the wood sponges were characterized by field emission scanning electron microscopy (Hitachi S4800, Japan) equipped with an energy dispersive X-ray spectroscopic detector for mapping. The high-resolution transmission electron microscopic (HRTEM) and selected area electron diffraction (SAED) images of the ZnO/ZnS@AWA were taken using a FEI HRTEM (FEI Tecnai G2, USA). The optical properties of the samples were studied by UV–vis absorption spectroscopy (Shimadzu UV-3600i Plus, Japan) and photoluminescence (PL) (Edinburgh FLS1000, England) spectroscopy at room temperature. The XRD patterns were obtained using a TD-3500 X-Ray Powder Diffractometer (Dandong Tongda Instrument Co., Ltd, China). X-ray photoelectron spectroscopy (XPS) (ESCALAB 250Xi, Thermo Fisher Scientific, USA) was performed with Al K $\alpha$  X-rays as the excitation source. Total C, H, O and N contents of samples were determined using an elemental analyzer (Euro EA3000 Organic element analyzer, Italian). A Perkin Elmer L1600400 Spectrum TWO FT-IR was used to measure the FT-IR spectrum. Acid-insoluble lignin, hemicellulose and  $\alpha$ -cellulose contents were measured in accordance with the GB/T 2677.8-94, GB/T 2677.10-1995 and GB/T 744-1989 standards, respectively. Carboxyl group content was measured using conductivity titration method. The nitrogen adsorption–desorption isotherms of samples were examined via JW-BK analyzer (Beijing JWGB SCI.&TECH, China). The electron paramagnetic resonance (EPR) signals of spin-trapped radicals were conducted on a EMXplus-6/1 spectrometer using spin-trap reagent 5,5-dimethyl-1-pyrroline-N-oxide (DMPO) in water for  $\bullet$ OH and methanol for  $\bullet$ O $_2^-$ , (4-oxo-2,2,6,6-tetramethyl) TEMP for 1O $_2$ , respectively. A 500 W Hg lamp was used as the light source.

The photoelectrochemical properties were measured using a conventional three electrode electrochemical workstation (CHI750E, China) with the samples as the working electrode, an Ag/AgCl electrode as the reference electrode, and a Pt plate as the counter electrode,

respectively, with a 0.5 M Na<sub>2</sub>SO<sub>4</sub> aqueous solution electrolyte. The film working electrodes were prepared by drop-casting samples, ethanol and Nafion suspensions onto FTO glass substrates followed by drying the film at room temperature. The photocurrent response curves were also recorded with xenon lamp light on and off (20s on and 20s off). Electrochemical impedance spectroscopy (EIS) was conducted using a potentiostatic method with a frequency from 0.1 kHz to 100 kHz. The Mott-Schottky plots were obtained at a constant frequency of 1.0 kHz and potential range -1-2V.

1. Supplementary Figures

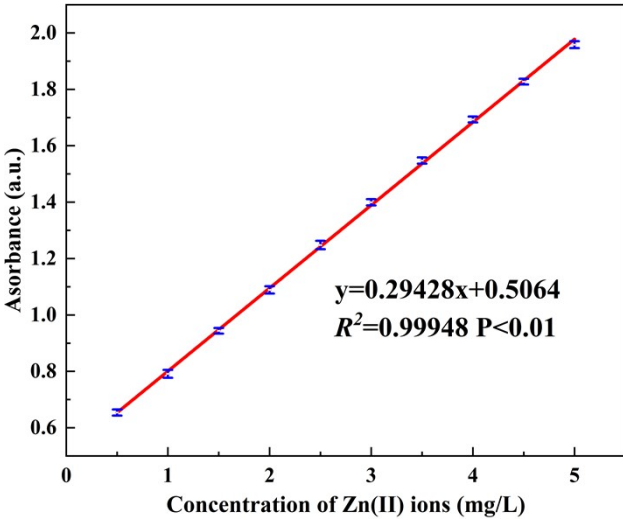

Fig. S1 The standard curve of Zn(II)

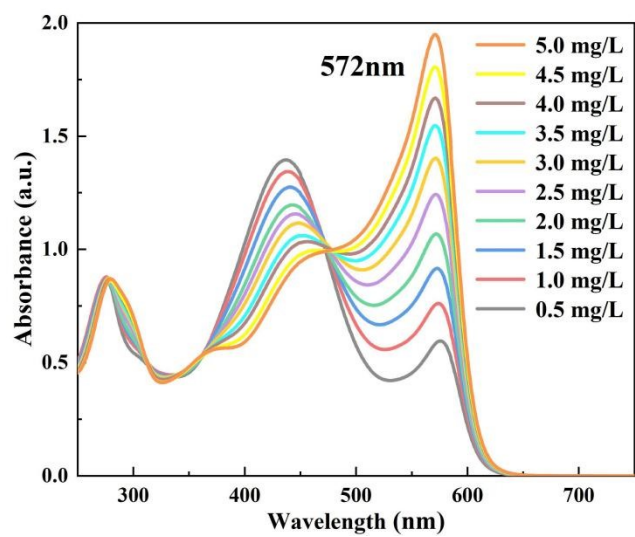

**Fig. S2** The wavelength scan of different concentration of Zn(II).

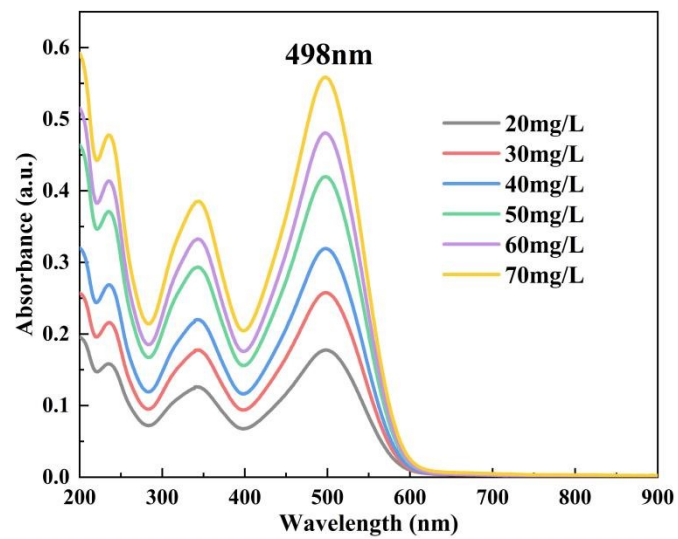

**Fig. S3** The wavelength scan of different concentration of Congo red

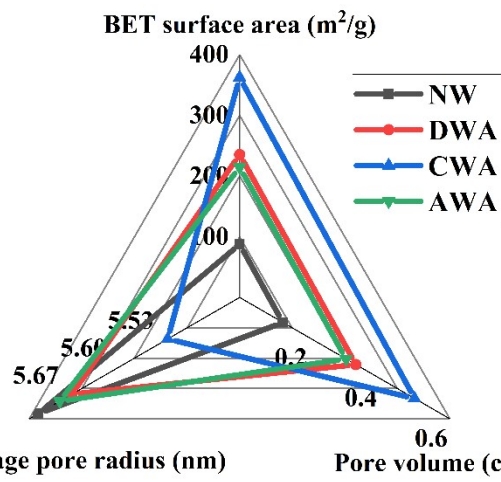

**Fig. S4** The BET surface area, pore volume and average pore radius of NW, DWA, CWA and AWA.

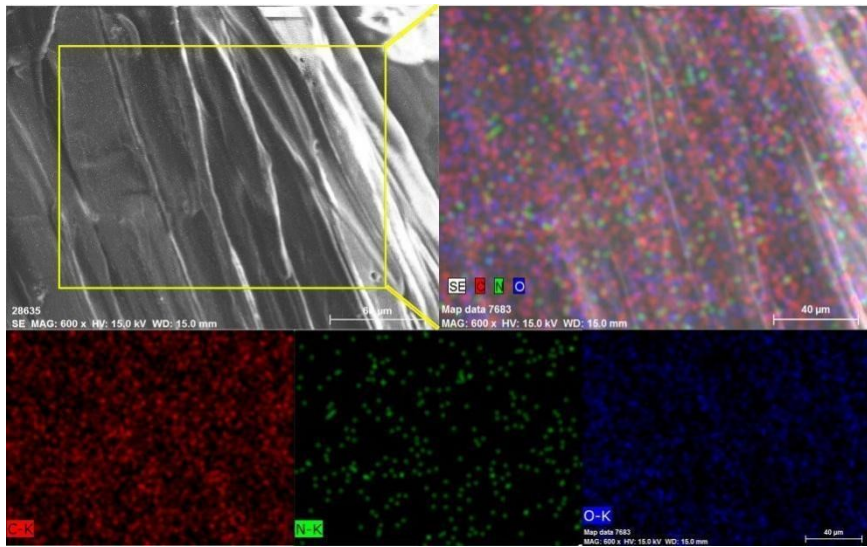

**Fig. S5** EDX-mapping of AWA.



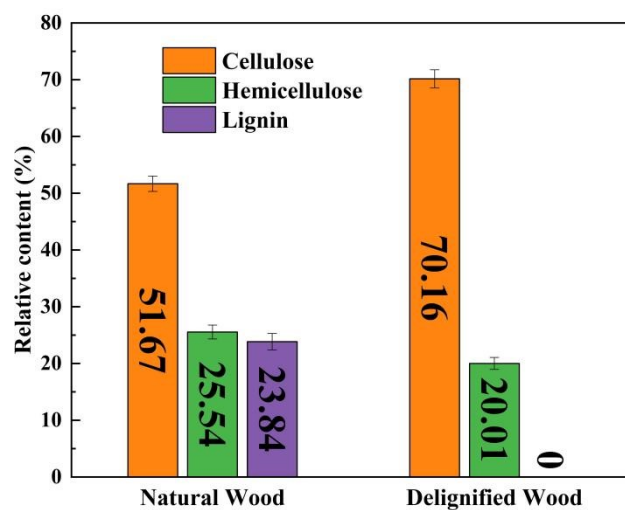

**Fig. S6** Relative content of cellulose, hemicelluloses, and lignin in Natural Wood and Delignified Wood obtained from the chemical composition analysis.

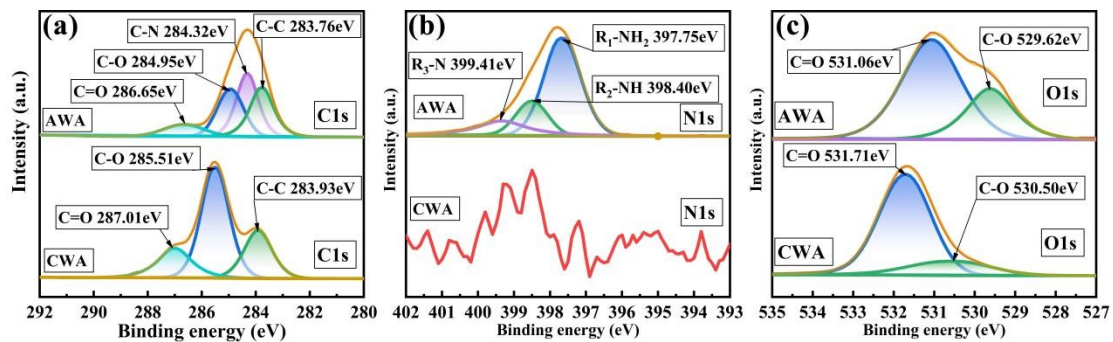

**Fig. S7** XPS spectra of AWA and CWA: C1s peak (a), N1s peak (b) and O1s peak (c)

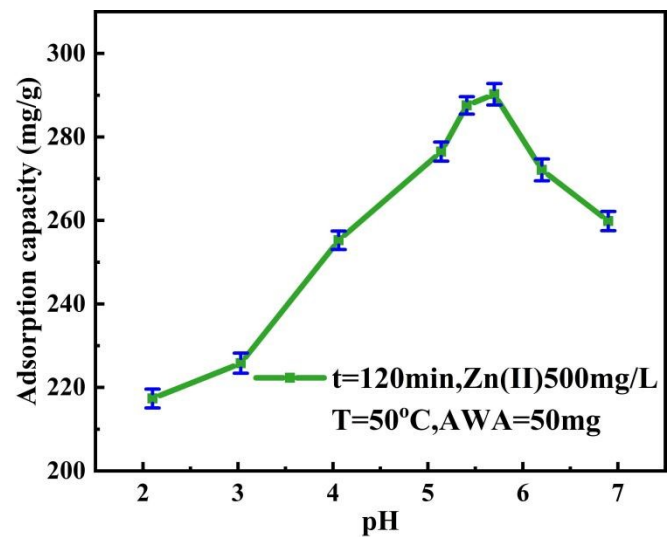

**Fig. S8** Effect of solution pH on the adsorption capacity of AWA.

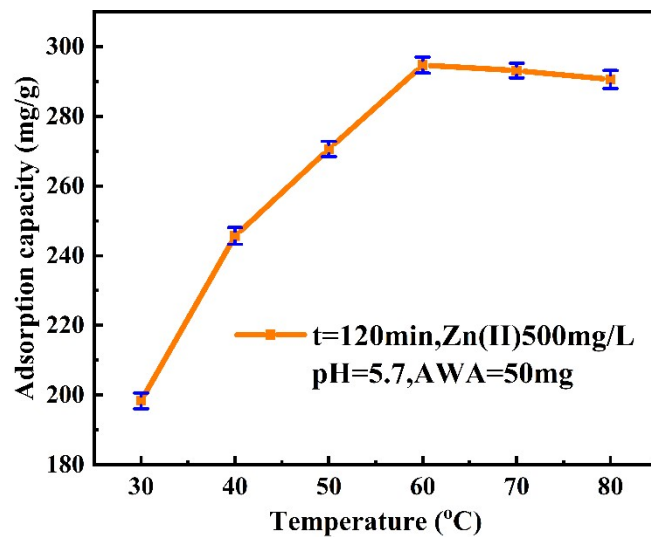

**Fig. S9** Effect of temperature on the adsorption capacity of AWA.

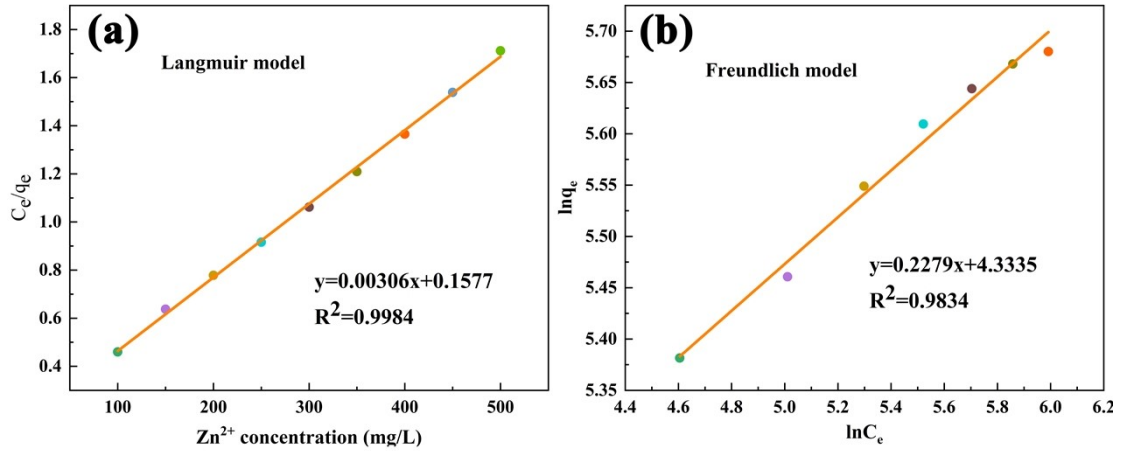

**Fig. S10** Adsorption isotherm linear fitting curves of Langmuir model and Freundlich model. Adsorption isotherm model equation as following shows.

Langmuir model:

$$\frac{C_e}{q_e} = \frac{1}{bq_m} + \frac{C_e}{q_{max}} \quad (1)$$

The essential characteristics of the Langmuir isotherm can be expressed by a dimensionless constant called the equilibrium parameter  $R_L$ , which is defined by the following equation (Eq. 2):

$$R_L = \frac{1}{1 + K_L C_0} \quad (2)$$

Freundlich model:

$$\ln q_e = \ln K_f + \frac{1}{n} C_e \quad (3)$$

where  $q_{max}$  (mg/g) is the monolayer saturation adsorption capacity;  $C_e$  (mg/L) is the concentration of metal ions at equilibrium;  $K_L$  (L/mg) is the Langmuir constant related to the adsorption capacity; the value of  $R_L$  indicates the nature of the isotherm as unfavorable ( $R_L > 1$ ), linear ( $R_L = 1$ ), favorable ( $0 < R_L < 1$ ), or irreversible ( $R_L = 0$ );  $K_f$  is the Freundlich constant,  $1/n$  is the value used to indicate the heterogeneity of the interface;  $q_e$  (mg/g) is the adsorption capacity at equilibrium.

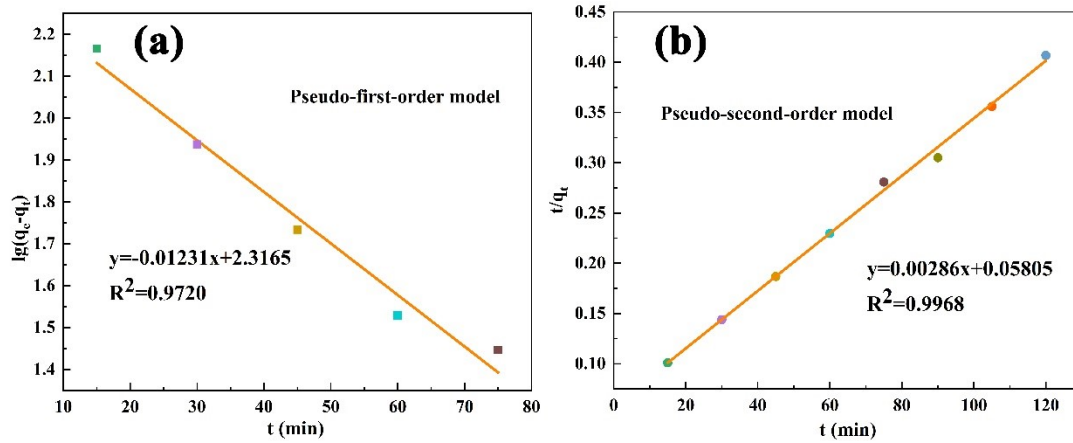

**Fig. S11** Adsorption kinetics linear fitting curves of Pseudo-first-order model and Pseudo-second-order model.

Adsorption kinetics model equation as following shows.

Pseudo-first-order model:

$$\log(q_e - q_t) = \log q_e - \frac{k_1 t}{2.303} \quad (4)$$

Pseudo-second-order model:

$$\frac{t}{q_t} = \frac{1}{k_2 q_e^2} + \frac{t}{q_e} \quad (5)$$

where  $q_e$  and  $q_t$  are the amounts of heavy metal ions adsorbed (mg/g) at equilibrium and at time  $t$  (min), respectively;  $k_1$  ( $\text{min}^{-1}$ ) is the Pseudo-first-order rate constant;  $k_2$  [ $\text{g} \cdot (\text{mg}/\text{min})^{-1}$ ] is the rate constant of the Pseudo-second-order adsorption kinetic equation.

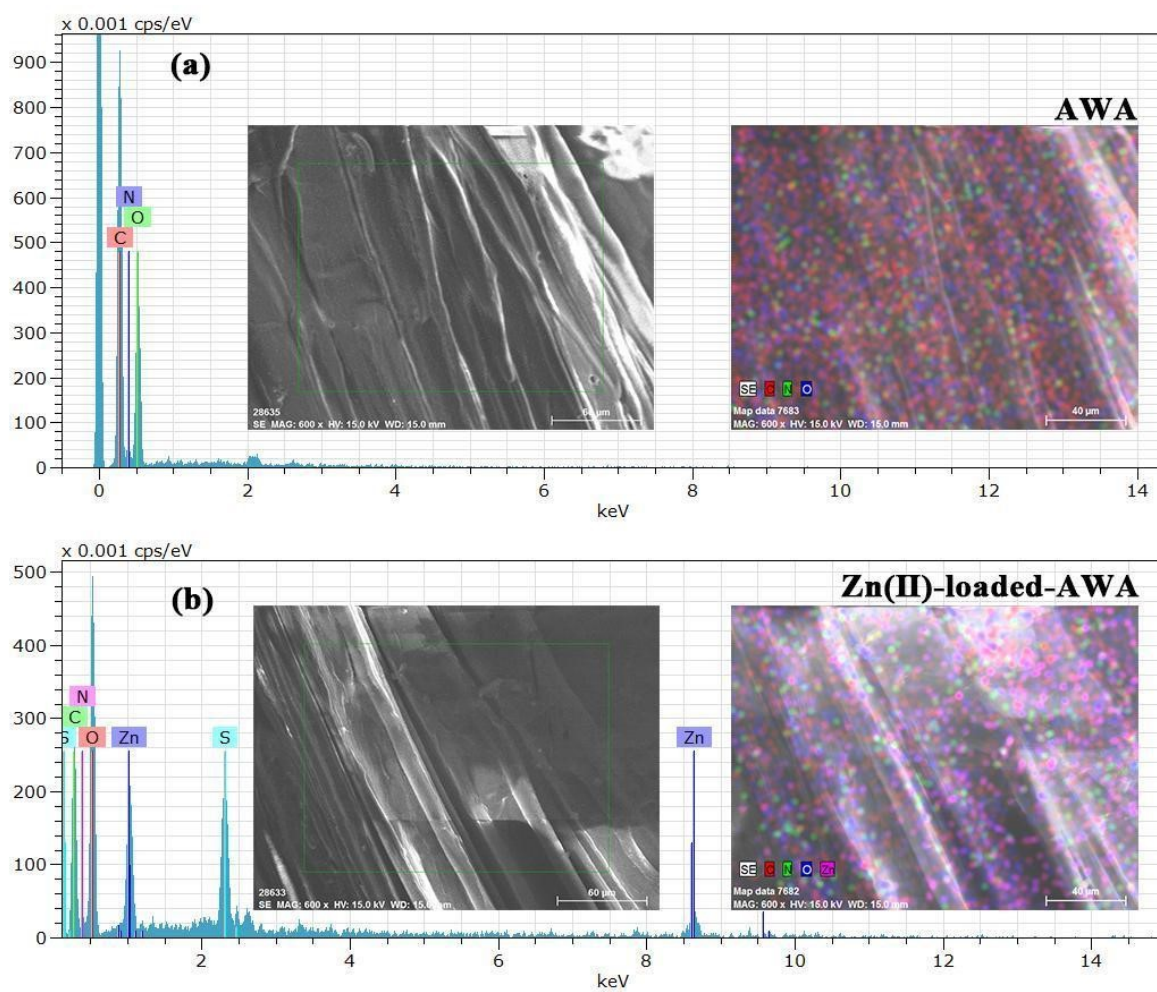

**Fig. S12** EDX and element mapping of AWA (a) and Zn(II)-loaded-AWA(b).

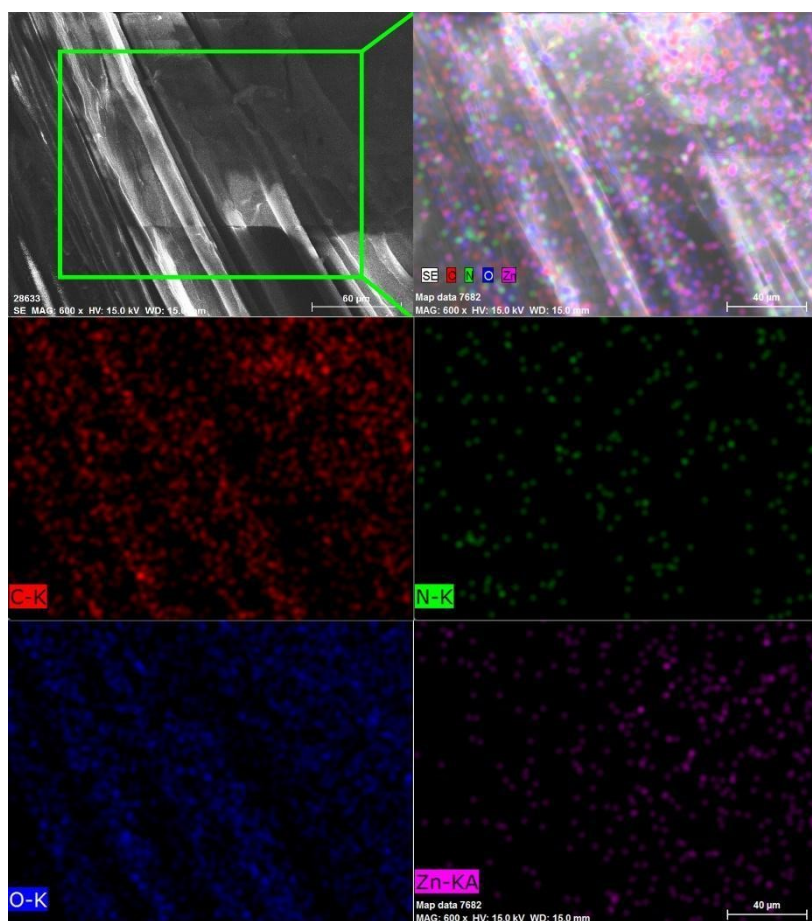

**Fig. S13** EDX-mapping of Zn(II)-loaded-AWA.



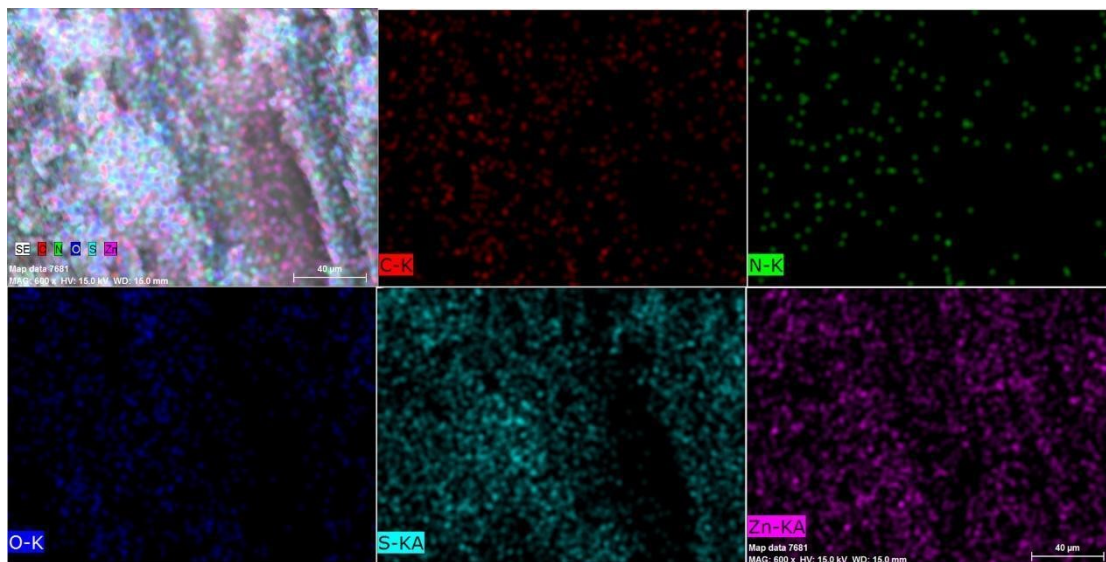

**Fig. S14** EDX-mapping of ZnO/ZnS@AWA

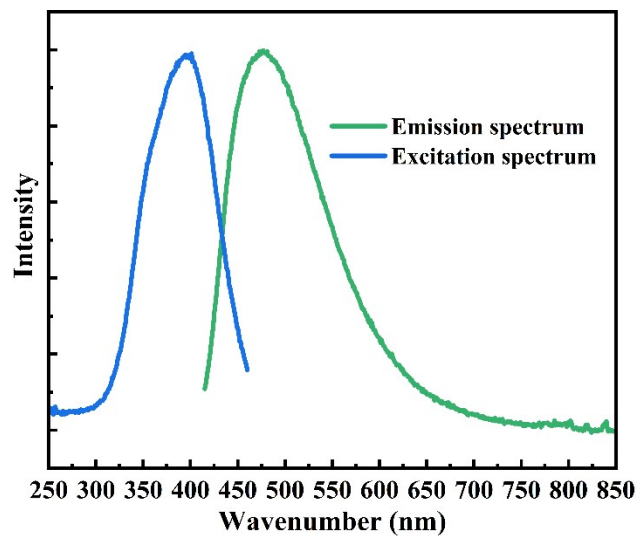

**Fig. S15** Steady-state PL spectra of ZnO/ZnS@AWA (d)

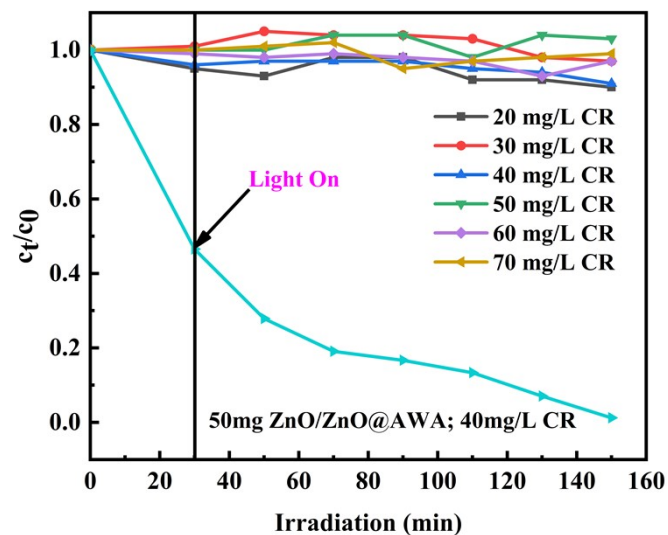

**Fig. 16** Photocatalysis degradation experiment for CR under UV light without photocatalysts.

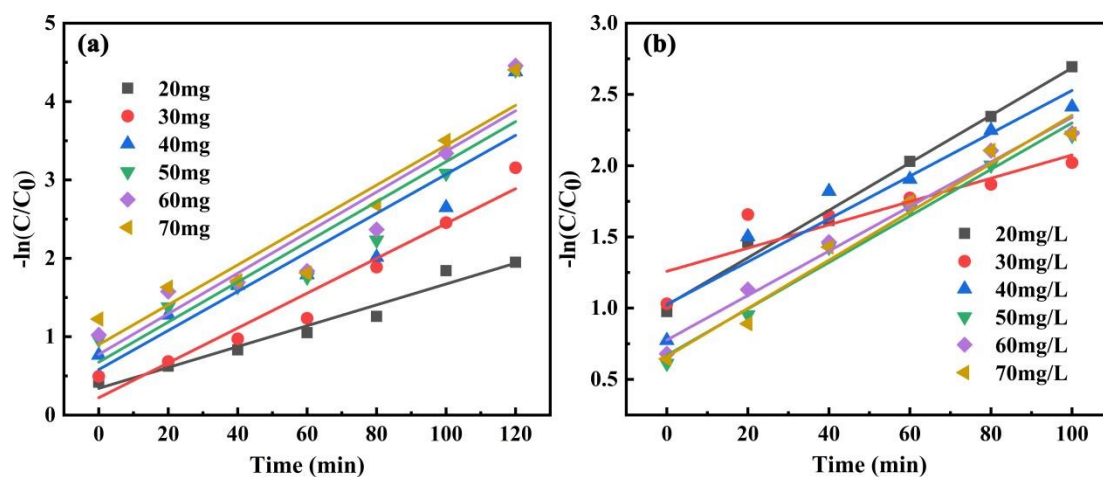

**Fig. S17** Pseudo first-order kinetic fitting curves under ultraviolet-light irradiation of different amount of catalyst (a) and CR initial concentration(b).

L-H kinetics model equation as following shows.

Pseudo-first-order kinetic model:

$$-\ln\left(\frac{A_t}{A_0}\right) = k_{app}t \quad (5)$$

where  $A_0$  and  $A_t$  are the absorbance of the Congo red in 498nm at initial and at time  $t$ , respectively,  $k_{app}$  is the apparent reaction rate constant.

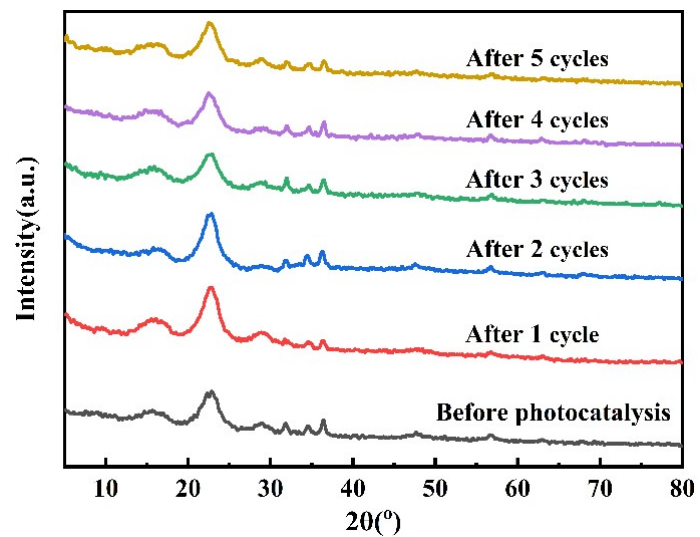

**Fig. S18** XRD patterns of ZnO/ZnS@AWA before and after photocatalysis experiment

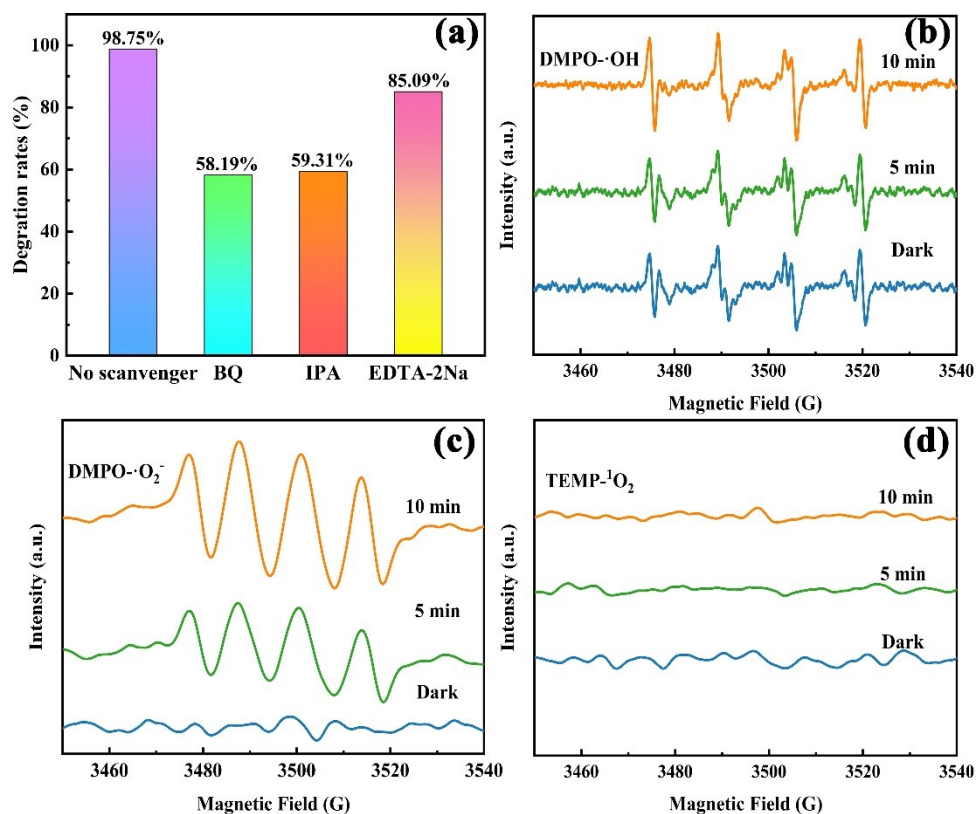

**Fig. S19** Effect of different scavengers on ZnO/ZnS@AWA for the photodegradation of CR (a); EPR spectra of the ZnO/ZnS@AWA under UV-irradiation for DMPO-·OH(b), DMPO-·O<sub>2</sub><sup>-</sup>(c) and TEMP-<sup>1</sup>O<sub>2</sub>(d).

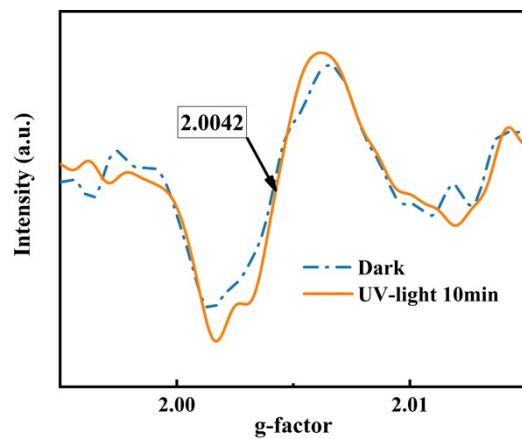

**Fig. S20** EPR spectra of the ZnO/ZnS@AWA under dark and UV-light 10 min.

## 2. Supplementary Tables

**Table. S1** Mean values of volume, weight and density of poplar wood (NW), Delignified@Wood-Aerogel (DWA), Carboxylation@Wood-Aerogel (CWA) and Amination@Wood-Aerogel (AWA).

| Samples | Volume (cm <sup>3</sup> ) | Weight (g) | Density (g·cm <sup>-3</sup> ) |
|---------|---------------------------|------------|-------------------------------|
| NW      | 3.375                     | 1.642      | 0.487                         |
| DWA     | 3.825                     | 0.949      | 0.248                         |
| CWA     | 5.175                     | 0.506      | 0.156                         |
| AWA     | 6.750                     | 0.938      | 0.139                         |



**Table. S2** Relative content of carboxyl group in CWA obtained from the conductivity titration method.

| <b>Samples</b> | <b>Time (h)</b> | <b>TEMPO (g)</b> | <b>NaClO<sub>2</sub> (g)</b> | <b>NaClO (mL)</b> | <b>Carboxyl Content (mmol/g)</b> |
|----------------|-----------------|------------------|------------------------------|-------------------|----------------------------------|
| 1#             | 24              | 0.032            | 2.26                         | 80                | 0.64                             |
| 2#             | 24              | 0.064            | 4.52                         | 80                | 0.72                             |
| 3#             | 24              | 0.096            | 6.78                         | 80                | 0.96                             |
| 4#             | 24              | 0.128            | 9.04                         | 80                | 1.013                            |
| 5#             | 48              | 0.032            | 2.26                         | 80                | 0.693                            |
| 6#             | 48              | 0.064            | 4.52                         | 80                | 0.747                            |
| 7#             | 48              | 0.096            | 6.78                         | 80                | 1.067                            |
| 8#             | 48              | 0.128            | 9.04                         | 80                | 1.174                            |

**Table. S3**  $R^2$  and constant values for the different adsorption isotherm models of Zn(II) on AWA.

| Metals | Parameters | Langmuir model |             | Freundlich model |            |
|--------|------------|----------------|-------------|------------------|------------|
| Zn(II) | $R^2$      |                | 0.9984      |                  | 0.9834     |
|        | Constants  | $K_L$          | 0.0194 L/mg | $K_f$            | 76.214 L/g |
|        |            | $q_{max}$      | 326.79 mg/g | $1/n$            | 0.228      |

**Table. S4** R<sup>2</sup> and constant values for the different adsorption kinetics models of Zn(II) on AWA

| Metals | Parameters     | Pseudo-first-order model |                           | Pseudo-second-order model |                   |
|--------|----------------|--------------------------|---------------------------|---------------------------|-------------------|
| Zn(II) | R <sup>2</sup> |                          | 0.9720                    |                           | 0.9968            |
|        | Constants      | k <sub>1</sub>           | 0.02835 min <sup>-1</sup> | k <sub>1</sub>            | 0.00014g/(mg·min) |
|        |                | q <sub>e</sub>           | 207.25 mg/g               | q <sub>e</sub>            | 349.65mg/g        |

**Table. S5** Comparison studies of the maximum monolayer adsorption of Zn(II) ions onto different adsorbent materials

| <b>Adsorbent</b>                   | <b>Adsorption capacity (mg/g)</b> | <b>Adsorption isotherm model</b> | <b>Adsorption kinetics model</b> | <b>Ref.</b> |
|------------------------------------|-----------------------------------|----------------------------------|----------------------------------|-------------|
| AWA                                | 326.79                            | Langmuir                         | Pseudo second-order              | This work   |
| MgSi-HC                            | 227.3                             | Sips                             | Pseudo second-order              | 1           |
| Alkali-PEI-HC                      | 207                               | Freundlich                       | Pseudo second-order              | 2           |
| Titanate nanotubes                 | 139.44                            | Langmuir                         | Pseudo second-order              | 3           |
| MCC-g-polyIL                       | 122.78                            | Freundlich                       | Pseudo second-order              | 4           |
| Sandwich-like Nanofibrous Mats     | 104.31                            | Langmuir                         | Pseudo second-order              | 5           |
| Green alga Neochloris oleoabundans | 59.50                             | Langmuir                         | Pseudo second-order              | 6           |
| Pinus elliottii sawdust            | 16.55                             | Langmuir                         | Pseudo second-order              | 7           |

**Table. S6** Comparison studies of the degradation of Congo red onto different adsorbent materials

| Photocatalyst                  | Concentration (mg/L) | Time (min) | Degradation Rate | Ref.      |
|--------------------------------|----------------------|------------|------------------|-----------|
| ZnO/ZnS@AWA                    | 40                   | 120        | 98.84%           | This work |
| ZnCCSs                         | 50                   | 120        | 96.53            | 8         |
| Bi <sub>2</sub> S <sub>3</sub> | 35                   | 150        | 98%              | 9         |
| Cu/TiM                         | 25                   | 210        | 98%              | 10        |
| ZIF-8@TiO <sub>2</sub> (5%KI)  | 20                   | 40         | 97%              | 11        |
| Pd/ZnO                         | 16                   | 60         | 98.2%            | 12        |
| ZnO/SnO <sub>2</sub>           | 5                    | 120        | 88.14%           | 13        |

## Reference

1. J. Deng, X. Li, X. Wei, Y. Liu, J. Liang, B. Song, Y. Shao and W. Huang, *Chemical Engineering Journal*, 2020, **387**.
2. X. He, T. Zhang, Q. Xue, Y. Zhou, H. Wang, N. S. Bolan, R. Jiang and D. C. W. Tsang, *Sci Total Environ*, 2021, **778**, 146116.
3. W. Linghu, Y. Sun, H. Yang, K. Chang, G. Sheng, T. Hayat, N. S. Alharbi and J. Ma, *Journal of Molecular Liquids*, 2017, **244**, 146-153.
4. A. Wang, S. Li, H. Chen, Y. Hu and X. Peng, *Cellulose*, 2019, **26**, 6849-6859.
5. Y. Wu, X. Qiu, S. Cao, J. Chen, X. Shi, Y. Du and H. Deng, *J Colloid Interface Sci*, 2019, **539**, 533-544.
6. S. Gu and C. Q. Lan, *J Hazard Mater*, 2021, **418**, 126336.
7. J. Bortoluz, A. Cemin, L. R. Bonetto, F. Ferrarini, V. I. Esteves and M. Giovanela, *Cellulose*, 2019, **26**, 4895-4908.
8. J. You, C. Liu, X. Feng, B. Lu, L. Xia and X. Zhuang, *Carbohydrate Polymers*, 2022, **288**.
9. C. Sambathkumar, V. Manirathinam, A. Manikandan, M. Krishna Kumar, S. Sudhahar and P. Devendran, *Journal of Materials Science: Materials in Electronics*, 2021, **32**, 20827-20843.
10. U. Arellano, J. A. Wang, L. F. Chen, M. Asomoza, A. Guzmán, S. Solís, A. Estrella, S. Cipagauta and L. E. Noreña, *Catalysis Today*, 2020, **349**, 128-140.
11. Z. Liu, W. Zhang, X. Zhao, X. Sheng, Z. Hu, Q. Wang, Z. Chen, S. Wang, X. Zhang and X. Wang, *Materials*, 2022, **15**.
12. C. B. Ong, A. W. Mohammad, R. Rohani, M. M. Ba-Abbad and N. H. H. Hairom, *Process Safety and Environmental Protection*, 2016, **104**, 549-557.
13. M. H. Sayadi, S. Ghollasimood, N. Ahmadpour and S. Homaeigohar, *Journal of Photochemistry and Photobiology A: Chemistry*, 2022, **425**.
